# Supplementary material for: Characterization of Proteins Regulated by Androgen and Protein Kinase a Signaling in VCaP Prostate Cancer Cells
Source: MDPI journal article supplement (doi:10.3390/biomedicines9101404), 2021-10-06
Supplement: s1 [file s1]

**Table S1. Oligonucleotide primers used in the study.**

| Primer  | Sequences |                                      |
|---------|-----------|--------------------------------------|
| TUFM    | (forward) | 5' - GTT CTC CCT GAC TTG GGA CA -3'  |
|         | (reverse) | 5' - CCA GCG TGT TGG TGA CTA GA -3'  |
| HNRNPH3 | (forward) | 5' - GCT ATG GTG GAG CTG GTG AT -3'  |
|         | (reverse) | 5' - TCT GCT TCT CCT GTG GCT CT -3'  |
| LDHB    | (forward) | 5' - TGC TCT TGT GGA TGT TTT GG -3'  |
|         | (reverse) | 5' - GAC TCT CCC CTT CTT GCT GA -3'  |
| HNRNPK  | (forward) | 5' - TTC AGT CCC AGA CAG CAG TG -3'  |
|         | (reverse) | 5' - TCC ACA GCA GCA GAT TCG AG -3'  |
| OXCT1   | (forward) | 5' - GGG TCC ATA TCC ACG ACA AC -3'  |
|         | (reverse) | 5' - CCA GTT AGC CAG GTC ACC AT -3'  |
| CCT2    | (forward) | 5' - GAA CAT GCG GAA AAG GAA AA - 3' |
|         | (reverse) | 5' - AGA GGC AAT TTC ACC ACC TG - 3' |
| ACPP    | (forward) | 5' - GAC GTT GAC CGG ACT TTG AT - 3' |
|         | (reverse) | 5' - TTC TTG AAA ACG AGG GCA GT - 3' |
| IMPDH2  | (forward) | 5' - CCG GAC AGA CCT GAA GAA GA -3'  |
|         | (reverse) | 5' - TGG GAA GAG TCC AAA ACC AC -3'  |

**Table S2. List of proteins identified by MS**

| Treatment | Gene name | Acc. No. <sup>1</sup> | Protein name                                                    | MW <sup>2</sup> (KDa) | pI <sup>3</sup> | Cellular component                                                    | Biological process                                                                                       |
|-----------|-----------|-----------------------|-----------------------------------------------------------------|-----------------------|-----------------|-----------------------------------------------------------------------|----------------------------------------------------------------------------------------------------------|
| DHT       | TUFM      | P49411                | elongation factor Tu, mitochondrial                             | 49.510                | 7.61            | membrane; mitochondrion                                               | metabolic process; response to stimulus                                                                  |
|           | HNRNPH3   | P31942                | Heterogeneous nuclear ribonucleoprotein H3                      | 36.903                | 6.87            | nucleus; spliceosomal complex                                         | cell differentiation; metabolic process                                                                  |
|           | LDHB      | P07195                | L-lactate dehydrogenase B chain                                 | 36.615                | 6.05            | cytoplasm; cytosol; membrane; mitochondrion                           | metabolic process                                                                                        |
| FSK       | IMPDH2    | P12268                | inosine-5'-monophosphate dehydrogenase 2                        | 55.770                | 6.90            | cytoplasm; cytosol; extracellular; membrane; nucleus; organelle lumen | cell organization and biogenesis; cell proliferation; metabolic process; response to stimulus; transport |
|           | HNRNPK    | P61978                | Heterogeneous nuclear ribonucleoprotein K                       | 50.996                | 5.33            | cytoplasm; membrane; nucleus; spliceosomal complex                    | metabolic process; regulation of biological process; response to stimulus                                |
|           | OXCT1     | P55809                | Succinyl-CoA:3-ketoacid coenzyme A transferase 1, mitochondrial | 56.122                | 7.46            | mitochondrion; organelle lumen                                        | metabolic process; regulation of biological process; response to stimulus                                |
|           | CCT2      | P78371                | T-complex protein 1 subunit beta                                | 57.452                | 6.46            | cytoplasm; cytosol; extracellular; organelle lumen                    | cell organization and biogenesis; metabolic process; regulation of biological process; transport         |
|           | ACPP      | P15309                | Prostatic acid phosphatase                                      | 48.305                | 7.02            | membrane; nucleus                                                     | metabolic process; regulation of biological process; transport                                           |

<sup>1</sup> Acc. No., UniProt accession number    <sup>2</sup> MW, Molecular weight    <sup>3</sup> pI, Isoelectric point
