# Supplementary figures and images for: Characterization of Proteins Regulated by Androgen and Protein Kinase a Signaling in VCaP Prostate Cancer Cells
Source: MDPI journal article supplement (doi:10.3390/biomedicines9101404), 2021-10-06

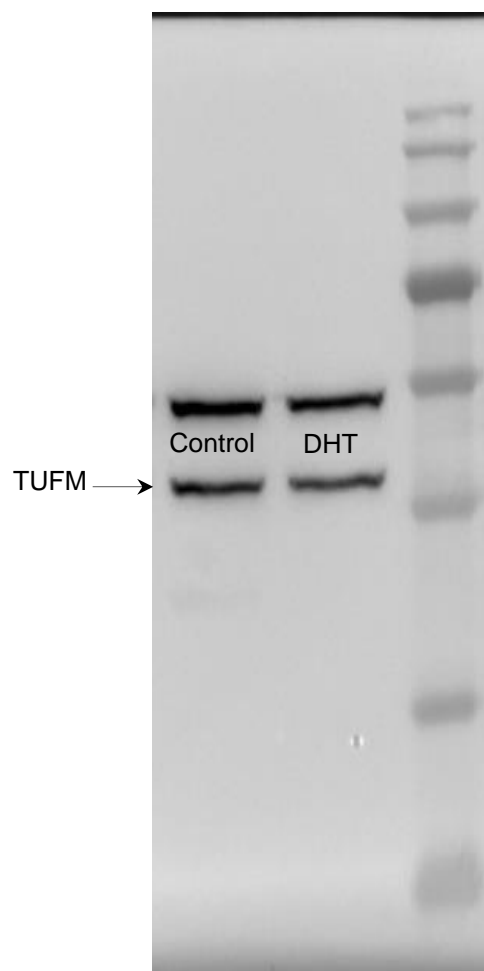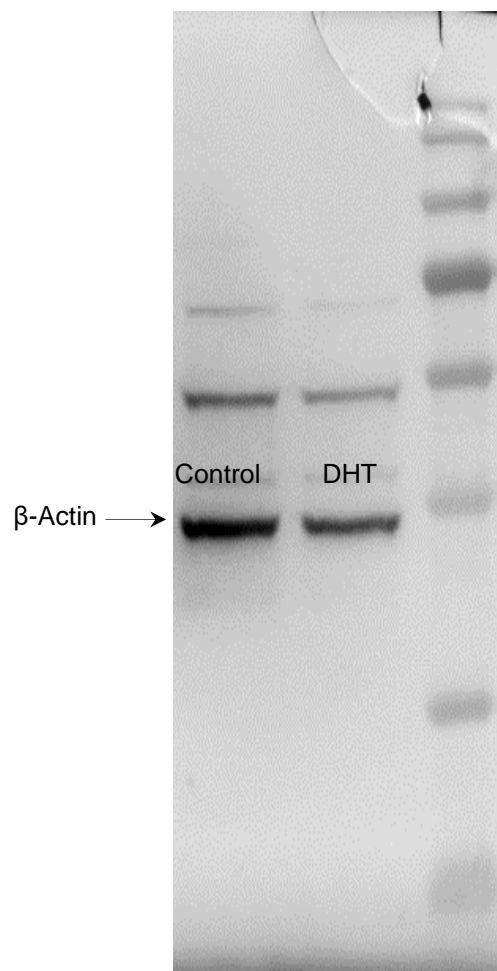

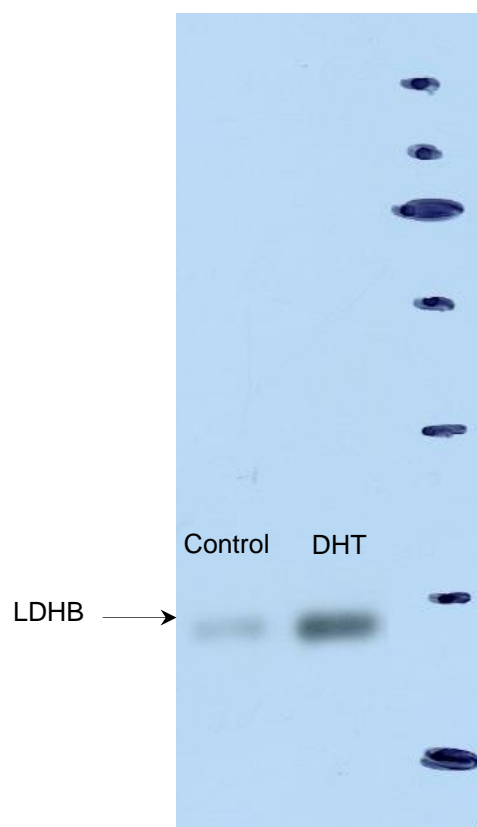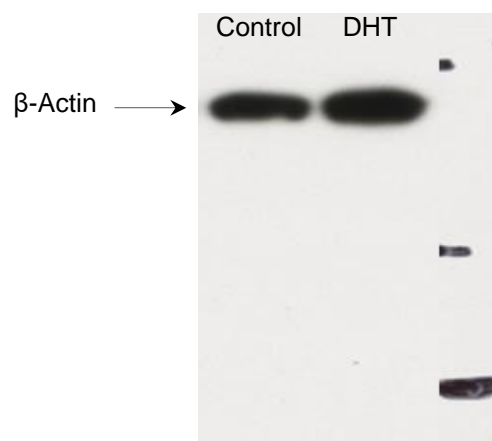

OXCT1 →

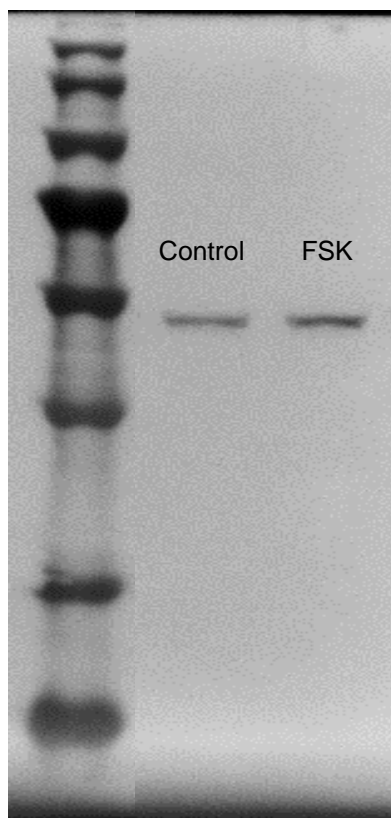

β-Actin →

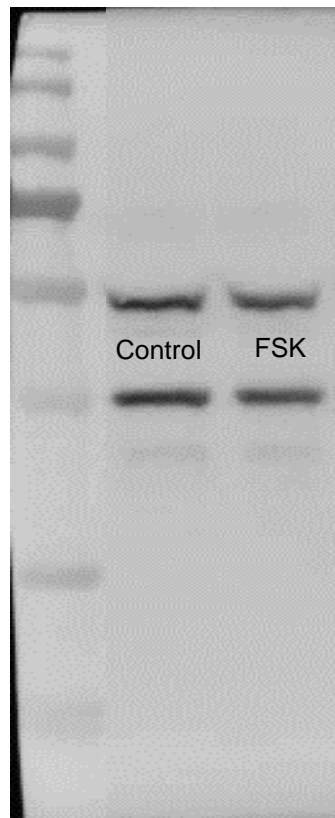

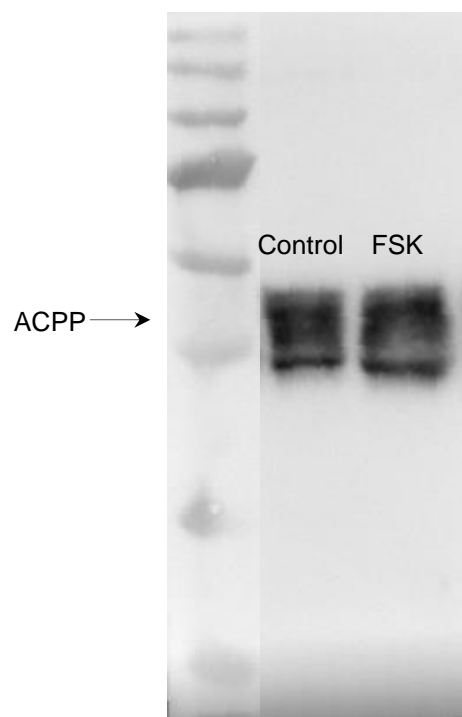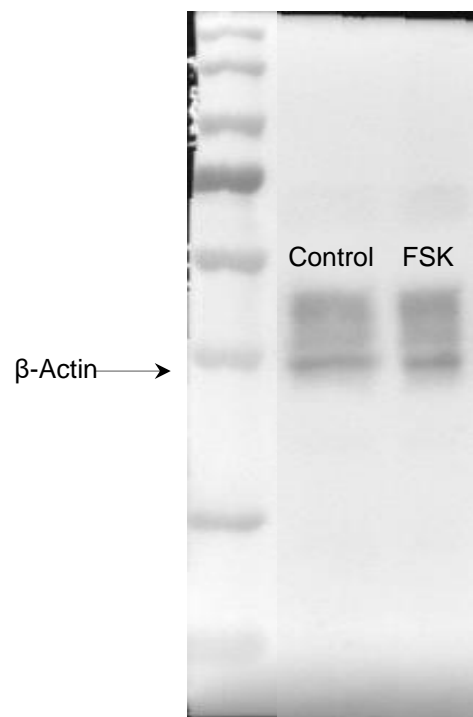

Supplement: s1 [file s1]
